# Supplementary material for: ‘What I cannot create, I do not understand’: functionally validated synergism of metabolic and target site insecticide resistance
Source: Proc Biol Sci. 2020 May 27;287(1927):20200838. doi: 10.1098/rspb.2020.0838 (PMC7287358; doi:10.1098/rspb.2020.0838)
Supplement: Dataset 1 [file rspb20200838supp2.xlsx]

## Sheet: Daily and Total Fecundity
	Daily Fecundity (Gaps indicate female was dead)																				Total Fecundity (Sum of the eggs laid by the female in the duration of 20 Days)
Strain	Day 1	Day 2	Day 3	Day 4	Day 5	Day 6	Day 7	Day 8	Day 9	Day 10	Day 11	Day 12	Day 13	Day 14	Day 15	Day 16	Day 17	Day 18	Day 19	Day 20	Total
L1014F	0	0	50	53	52	49	66	32	35	42	24	8	4	0	0	0	0				415
L1014F	0	8	48																		56
L1014F	0	2	53	67	30	65	74	91	94	110	76	59	56	26	47	57	42	37	11	0	997
L1014F	0	5	29	47	50	56	61	46	76	42	23	19	12	4	0	0	0	0	0	0	470
L1014F	0	6	38	51	50	47	78	71	53	29	16	9	4	0	0						452
L1014F	0	4	35																		39
L1014F	0	19	62	37	61	58	63	45	58	48	34	20	0	0	0	0	0	0	0		505
L1014F	0	5	32	61	62	57	74	75	83	82	44	53	40	7	10	0	0	0	0	0	685
L1014F	0	0	0	60	54	56	65	82	59	80	50	66	32	0	18	23	10	13	6	4	678
L1014F	0	0	17	53	70	72	57	66	92	74	53	53	36	30	23	2	0	0	0	0	698
L1014F	0	0	6	5	3	15	19	20													68
L1014F;CYP6BQ23	0	5	45	23	69	70	71	84	40	66	80	84	80	43	67	60	62	51	42	45	1087
L1014F;CYP6BQ23	0	1	50	37	65	61	72	83	71	89	73	57	70	36	57	42	19	26	47	47	1003
L1014F;CYP6BQ23	0	9	61	43	55	89	68	74	79	67	53	56	62	63	32	71	27	63	46	26	1044
L1014F;CYP6BQ23	0	4	46	31	53	65	44	60	29	18	3	4									357
L1014F;CYP6BQ23	0	11	63	21	42	38	42	34	40	36	34	27	29	25	24	36	24	23	21	18	588
L1014F;CYP6BQ23	0	3	55	31	54	66	66	45	62	90	72	67	35	36	41	43	51	36	15	0	868
L1014F;CYP6BQ23	0	5	65	13	48	44	60	69	68	78	71	61	61	58	49	62	57	31	64	58	1022
L1014F;CYP6BQ23	0	10	58	38	85	77	77	102	39	39	56	90	55	57	39	70	61	61	65	44	1123
L1014F;CYP6BQ23	0	4	69	69	67	67	48	73	72	75	62	73	52	45	64	53	42	30	37	36	1038
yw;attP40	0	6	49	67	62	55	81	94	83	90	79	84	73	65	39						927
yw;attP40	0	10	33	67	65	50	43	80	92	95	85	79	73	20	36	60	64	27	68	43	1090
yw;attP40	0	7	45	26	32	44	63	46	50	58	50	43	52	42	40	42	18	40	35	31	764
yw;attP40	0	6	61	65	63	77	70	82	85	83	62	41	42	33	27	44	35	26	21	19	942
yw;attP40	0	1	46	62	60	53	42	63	69	78	67	56	71	44	67	71	72	59	54	57	1092
yw;attP40	0	0	36	62	70	66	84	91	92	91	87	81	78	31	40	80	83	69	39	51	1231
yw;attP40	0	4	61	58	56	74	88	85	67	84	72	82	81	46	75	85	53	77	60	49	1257
yw;attP40	0	14	73	91	86	75	79	99	101	94	81	77	75	42	24	60	71	13	41	34	1230
yw;attP40	0	15	22	76	52	56	99	90	99	111	88	52	61	34	33	36	11	32	26	21	1014
yw;attP40	0	19	68	72	54	78	92	88	101	86	78	74	73	51	48	95	74	45	87	62	1345
yw;attP40	0	0	8	57	63	42	61	67	58	60	39	45	43	37	39	55	46	57	53	69	899
yw;attP40	0	15	32	37	74	51	85	90	98	91	93	95	81	64	66	85	40	52	64	61	1274
yw;attP40	0	7	39	56	61	44	68	73	78	75	76	55	71	33	30	53	56	62	59		996
nanos.Cas9	0	0	18	45	74	67	57	82	69	74	51	74	47	24	49	40	21	18	14	6	830
nanos.Cas9	0	0	53	52	78	65	62	70	92	87	72	80	65	53	61	54	30	54	43	62	1133
nanos.Cas9	0	6	71	63	82	77	66	78	76	72	74	65	59	59	63	64	39	57	45	50	1166
nanos.Cas9	0	0	64	61	55	36	28	24	21	19	26	31	25	26	24	30	24	32	25	15	566
nanos.Cas9	0	0	66	64	79	53	84	69	91	82	61	77	58	50	44	58	57	46	33	35	1107
nanos.Cas9	0	0	70	65	45	65	82	65	25	86	74	60	36	43	2	41	40	45	20	45	909
nanos.Cas9	0	6	44	28	63	78	62	68	78	74	80	61	67	73	67	45	42	73	62	64	1135
nanos.Cas9	0	13	60	50	74	42	72	57	57	52	45	51	42	43	35	39	13	26	23	24	818
nanos.Cas9	0	5	63	66	75	68	74	80	82	73	67	33	44	30	17	30	29	46	31	19	932
nanos.Cas9	0	2	36	56	48	52	63	80	77	57	44	53	54	50	57	45	34	53	38	29	928
HRgal4XCYP6BQ23	0	7	63	22	49	65	64	85	79	88	78	72	71	73	65						881
HRgal4XCYP6BQ23	0	14	57	47	62	66	64	73	71	76	70	68	63	40	68	64	32	15	37	57	1044
HRgal4XCYP6BQ23	0	13	53	34	49	67	67	65	45	51	51	65	55	41	39	78	65	69	49	44	1000
HRgal4XCYP6BQ23	0	0	44	30	67	57	59	57	76	59	55	55	51	45	48	54	44	49	26	43	919
HRgal4XCYP6BQ23	0	10	61	36	71	69	68	74	82	95	73	78	83	43	63	70	28	55	47	44	1150
HRgal4XCYP6BQ23	0	10	61	37	72	73	83	79	83	87	81	62	75	33	32	69	81	75	72	65	1230
HRgal4XCYP6BQ23	0	11	53	54	70	69	71	84	85	87	85	83	82	50	47	72	63	65	77	16	1224
HRgal4XCYP6BQ23	0	16	57	36	79	71	74	92	86	82	92	68	68	28	27	45	17	30	35	44	1047
HRgal4XCYP6BQ23	0	14	72	42	67	72	73	89	92	79	80	76	79	72	61	72	70	74	47	34	1265
HRgal4XCYP6BQ23	0	8	64	34	60	66	80	66	75	69	86	68	74	68	59	74	68	63	33	50	1165
HRgal4XCYP6BQ23	0	19	50	53	59	56	68	61	48	27	32	34	34	34							575
HRgal4XCYP6BQ23	0	10	60	53	87	73	76	80	91	94	85	76	65	79	40	82	64	80	32	56	1283
V1016G	0	6	62	71	78	71	73	73	76	83	76	68	69	27	35	50	33	37	4	1	993
V1016G	0	6	41	29	60	50	46	33	37												302
V1016G	0	5	61	24	29	27	32	24	29	25	11	15	17	5	9	0	0	0	0	0	313
V1016G	0	0	52	58	54	53	46	37	57	49	56	67	41	25	14	27	34	46	39	32	787
V1016G	0	9	38	84	55	75	86	72	81	73	74	77	62	38	33	71	49	65	43	61	1146
V1016G	0	12	67	78	79	72	51	62	76	46	25	36	48	15	18	33	25	24	24	12	803
V1016G	0	1	37	73	69	62	48	50	68	65	63	67	63	41	47	63	47	42	34	26	966
V1016G	0	0	23	68	68	46	68	47	55	71	68	33	7	8	41	0	0	0	0	0	603
V1016G	0	20	66	67	79																232
V1016G	0	15	68	71	70	76	79	80	92	90	81	78	62	30	40	44	46	22	39	54	1137
V1016G	0	0	49	69	64	55	75	68	55	59	59	65	55	54	52	61	44	44	43	50	1021
HRgal4XCYP9J28	0	3	57	47	28	44	52	46	49	32	42	23	28	24	21	12	15	10	7	8	548
HRgal4XCYP9J28	0	7	47	47	36	43	45	53	44	49	40	32	43	29	26	25	14	9	2	1	592
HRgal4XCYP9J28	0	7	77	38	42	43	52	50	50	42	26	29	5								461
HRgal4XCYP9J28	0	0	11	52	64	65	59	65	70	54	52	34	45	11	23	21	0	0	0	0	626
HRgal4XCYP9J28	0	0	4	30	30	24	27	20	21	23	29	12	13	17	16	13	10	11	9	10	319
HRgal4XCYP9J28	0	0	35	48	49	33	35	56	64	71	21	0		0	0	0					412
HRgal4XCYP9J28	0	5	45	50	69	52	63	74	72	71	55	59	48	36	29	31	18	19	16	20	832
HRgal4XCYP9J28	0	3	35	49	53	48	47	35	42	31	26	21	14	16	9	7	5	3	6	5	455
HRgal4XCYP9J28	0	20	65	68	78	64	47	49	70	65	46	50	54	23	10	40	36	12	15	0	812
HRgal4XCYP9J28	0	0	8	59	65	57	60	71	74	66	64	45	43	20	39	33	42	26	24	23	819
HRgal4XCYP9J28	0	8	52	56	53	61	57	64	55	47	49	43	28	30	23	18	16	10	2	0	672
V1016G;CYP9J28	0	20	25	56	41	36	35	26	14	25	13	0	0	0	0	0	0				291
V1016G;CYP9J28	0	16	67	52	60	50	62	60	45	50	36	31	8	5	0	1	0	0	0	1	544
V1016G;CYP9J28	0	5	37	6	24	10	5	5	9	2	10	5	2	1	5	4	1	0	0	0	131
V1016G;CYP9J28	0	17	38	24																	79
V1016G;CYP9J28	0	0	26	25	35	29	23	18	30	21	5	3	0								215
V1016G;CYP9J28	0	0	0	46	46	53	45	49	53	58	47	47	38	31	18	24	22	26	21	18	642
V1016G;CYP9J28	0	0	17	36	40	25	11	18	12	4	0	1	0	0							164
V1016G;CYP9J28	0	0	9	37	54	32	26	15	0	0	0	0	0	0	0	0					173
V1016G;CYP9J28	0	0	28	57	61	33	34	34	34	28	27	19	7	10	13	12	8	0	0	0	405

## Sheet: Sex_Ratio
	N(Initial Amount of Eggs) = 50 / replicate
	Sex Ratio
Strain	Males	Females	Total Adults
L1014F	18	25	43
L1014F	14	19	33
L1014F	23	13	36
L1014F	13	21	34
L1014F	19	17	36
L1014F	15	16	31
L1014F	17	6	23
L1014F	15	17	32
L1014F	11	6	17
L1014F	11	20	31
V1016G	20	8	28
V1016G	15	10	25
V1016G	10	12	22
V1016G	11	13	24
V1016G	10	16	26
V1016G	19	16	35
V1016G	16	15	31
V1016G	17	15	32
V1016G	15	21	36
V1016G	18	18	36
nanos.Cas9	9	18	27
nanos.Cas9	13	15	28
nanos.Cas9	13	10	23
nanos.Cas9	22	11	33
nanos.Cas9	15	13	28
nanos.Cas9	19	13	32
nanos.Cas9	20	17	37
nanos.Cas9	12	25	37
HRgal4XCYP9J28	18	15	33
HRgal4XCYP9J28	14	17	27
HRgal4XCYP9J28	19	14	33
HRgal4XCYP9J28	15	22	37
HRgal4XCYP9J28	13	21	32
HRgal4XCYP9J28	15	17	32
HRgal4XCYP9J28	25	16	41
HRgal4XCYP9J28	25	13	38
HRgal4XCYP9J28	18	23	41
HRgal4XCYP9J28	20	19	39
HRgal4XCYP6BQ23	21	19	40
HRgal4XCYP6BQ23	16	16	32
HRgal4XCYP6BQ23	18	18	35
HRgal4XCYP6BQ23	21	16	37
HRgal4XCYP6BQ23	16	18	34
HRgal4XCYP6BQ23	13	10	23
HRgal4XCYP6BQ23	13	10	23
HRgal4XCYP6BQ23	12	9	21
HRgal4XCYP6BQ23	12	11	23
HRgal4XCYP6BQ23	12	8	20
V1016G;CYP9J28	16	10	26
V1016G;CYP9J28	7	7	13
V1016G;CYP9J28	3	4	7
V1016G;CYP9J28	8	7	15
V1016G;CYP9J28	9	10	19
V1016G;CYP9J28	10	5	15
V1016G;CYP9J28	10	6	16
V1016G;CYP9J28	5	5	10
V1016G;CYP9J28	4	8	12
V1016G;CYP9J28	9	4	13
L1014F;CYP6BQ23	14	11	25
L1014F;CYP6BQ23	11	15	26
L1014F;CYP6BQ23	9	20	29
L1014F;CYP6BQ23	13	10	23
L1014F;CYP6BQ23	14	8	22
L1014F;CYP6BQ23	8	8	16
L1014F;CYP6BQ23	9	6	15
L1014F;CYP6BQ23	11	10	21
L1014F;CYP6BQ23	12	7	19
L1014F;CYP6BQ23	11	4	15
yw;attP40	19	13	32
yw;attP40	21	20	41
yw;attP40	20	18	38
yw;attP40	17	27	44
yw;attP40	15	15	30
yw;attP40	9	11	20
yw;attP40	7	8	15
yw;attP40	4	10	14
yw;attP40	11	10	21
yw;attP40	9	11	20

## Sheet: Sheet3
	Number of Pupae Observed per day
Strain	Day 6	Day 7	Day 8
L1014F	43	45	46
L1014F	35	35	35
L1014F	33	37	37
L1014F	35	36	37
L1014F	37	40	41
L1014F	26	29	31
L1014F	21	23	25
L1014F	30	33	33
L1014F	19	22	22
L1014F	29	31	24
V1016G	23	26	30
V1016G	20	26	27
V1016G	21	22	22
V1016G	20	23	23
V1016G	26	30	32
V1016G	31	36	36
V1016G	31	34	35
V1016G	26	31	33
V1016G	30	35	37
V1016G	32	33	37
nanos.Cas9	29	31	31
nanos.Cas9	29	29	30
nanos.Cas9	22	22	22
nanos.Cas9	35	35	38
nanos.Cas9	30	30	30
nanos.Cas9	30	31	31
nanos.Cas9	31	37	37
nanos.Cas9	35	37	37
HRgal4XCYP9J28	9	31	33
HRgal4XCYP9J28	0	23	31
HRgal4XCYP9J28	5	27	33
HRgal4XCYP9J28	8	38	39
HRgal4XCYP9J28	0	28	36
HRgal4XCYP9J28	7	31	33
HRgal4XCYP9J28	4	40	42
HRgal4XCYP9J28	12	37	39
HRgal4XCYP9J28	7	38	38
HRgal4XCYP9J28	7	38	40
HRgal4XCYP6BQ23	30	40	42
HRgal4XCYP6BQ23	10	26	28
HRgal4XCYP6BQ23	18	37	39
HRgal4XCYP6BQ23	35	37	37
HRgal4XCYP6BQ23	20	37	39
HRgal4XCYP6BQ23	24	24	24
HRgal4XCYP6BQ23	21	22	23
HRgal4XCYP6BQ23	21	22	22
HRgal4XCYP6BQ23	22	23	23
HRgal4XCYP6BQ23	16	21	22
V1016G;CYP9J28	22	28	28
V1016G;CYP9J28	15	17	18
V1016G;CYP9J28	8	11	11
V1016G;CYP9J28	17	22	22
V1016G;CYP9J28	17	23	25
V1016G;CYP9J28	15	18	19
V1016G;CYP9J28	15	21	21
V1016G;CYP9J28	9	16	17
V1016G;CYP9J28	14	15	15
V1016G;CYP9J28	10	15	16
L1014F;CYP6BQ23	4	26	26
L1014F;CYP6BQ23	0	32	32
L1014F;CYP6BQ23	3	20	29
L1014F;CYP6BQ23	14	22	22
L1014F;CYP6BQ23	9	19	19
L1014F;CYP6BQ23	2	15	16
L1014F;CYP6BQ23	3	12	14
L1014F;CYP6BQ23	11	18	21
L1014F;CYP6BQ23	9	17	20
L1014F;CYP6BQ23	3	15	15
yw;attP40	39	42	42
yw;attP40	14	46	46
yw;attP40	35	44	45
yw;attP40	41	39	44
yw;attP40	26	30	30
yw;attP40	21	23	23
yw;attP40	18	18	18
yw;attP40	14	15	15
yw;attP40	19	21	22
yw;attP40	18	20	20

## Sheet: Pupae Eclosion_Adult Emergence
	Each Value is equal to the adults emerged per day plus the adults emerged the previous day
	Total Female Adults Emerged/24hrs					Total Male Adults Emerged/24hrs
Strain	Day8	Day9	Day10	Day11	Day12	Day8	Day9	Day10	Day11	Day12
L1014F	0	10	25	25	25	0	5	18	18	18
L1014F	0	13	19	19	19	0	5	14	14	14
L1014F	0	1	13	13	13	0	7	22	23	23
L1014F	0	13	21	21	21	0	5	13	13	13
L1014F	0	10	17	17	17	0	9	19	19	19
V1016G	0	5	8	8	8	0	11	18	19	20
V1016G	0	3	10	10	10	0	3	14	15	15
V1016G	0	1	11	12	12	0	1	10	10	10
V1016G	0	3	12	12	13	0	5	10	11	11
V1016G	0	3	15	16	16	0	1	10	10	10
nanos.Cas9	1	17	19	19	19	1	6	10	10	10
nanos.Cas9	1	15	16	16	16	0	9	13	13	13
nanos.Cas9	2	12	12	12	12	1	9	14	14	14
HRgal4XCYP9J28	0	0	9	13	15	0	0	9	18	18
HRgal4XCYP9J28	0	0	3	17	17	0	0	0	10	14
HRgal4XCYP9J28	0	0	4	12	14	0	0	7	17	19
HRgal4XCYP9J28	0	0	20	22	22	0	0	13	15	15
HRgal4XCYP9J28	0	0	1	20	21	0	0	0	12	13
HRgal4XCYP6BQ23	0	2	18	18	19	0	1	17	20	21
HRgal4XCYP6BQ23	0	1	8	15	16	0	2	8	15	16
HRgal4XCYP6BQ23	0	3	16	17	18	0	0	15	18	18
HRgal4XCYP6BQ23	0	4	15	16	16	0	10	21	21	21
HRgal4XCYP6BQ23	0	1	16	18	18	0	0	13	16	16
V1016G;CYP9J28	0	0	11	11	11	0	0	9	14	14
V1016G;CYP9J28	0	0	6	15	15	0	0	0	11	11
V1016G;CYP9J28	0	0	8	16	20	0	0	1	4	9
V1016G;CYP9J28	0	1	10	10	10	0	0	10	13	13
V1016G;CYP9J28	0	2	7	8	8	0	1	10	14	14
L1014F;CYP6BQ23	0	7	10	10	10	0	4	14	16	16
L1014F;CYP6BQ23	0	6	7	7	7	0	0	6	6	7
L1014F;CYP6BQ23	0	2	4	4	4	0	1	1	3	3
L1014F;CYP6BQ23	0	4	7	7	7	0	0	7	8	8
L1014F;CYP6BQ23	0	8	10	10	10	0	4	6	9	9
yw;attP40	0	7	13	13	13	0	5	19	19	19
yw;attP40	0	0	17	20	20	0	0	18	21	21
yw;attP40	0	3	18	18	18	0	1	20	20	20
yw;attP40	0	23	27	27	27	0	12	17	17	17
yw;attP40	3	12	18	18	18	0	8	15	15	15
