# Supplementary material for: ‘What I cannot create, I do not understand’: functionally validated synergism of metabolic and target site insecticide resistance
Source: PubMed Central journal article supplement (PMC7287358; doi:10.1098/rspb.2020.0838), 2020-05-27
Supplement: rspb20200838supp1.pdf [file rspb20200838supp1.pdf]

## Supplementary Information

**Table S1: *Drosophila* strains used in this study**

| Strain                                                    | Description                                                                                                                                                                                                 | Source                                          |
|-----------------------------------------------------------|-------------------------------------------------------------------------------------------------------------------------------------------------------------------------------------------------------------|-------------------------------------------------|
| $y^1 M \{nos-Cas9.P\}ZH-2A w^*$<br>(referred as nos.Cas9) | Expresses Cas9 in germ line under <i>nanos</i> promoter                                                                                                                                                     | Bloomington Drosophila Stock Center #54591 [19] |
| $yw; TM3 Sb e/TM6B Tb Hu e$                               | Balancers for 3 <sup>rd</sup> chromosome (TM3 with <i>Stubble</i> marker. TM6B with <i>Tubby</i> and <i>Humoral</i> markers)                                                                                | IMBB flyroom stock                              |
| $yw; CyO/Sco$                                             | Balancer (CyO) for 2 <sup>nd</sup> chromosome, marked with <i>Curly</i> .                                                                                                                                   |                                                 |
| $(FRT)w^+ / FM7c Hw w B$                                  | Balancer (FM7c) for X chromosome marked with <i>Bar</i>                                                                                                                                                     |                                                 |
| $FM7 ; CyO / Sp$                                          | Balancer (FM7c) for X chromosome marked with <i>Bar</i> ; balancer for 2 <sup>nd</sup> chromosome (CyO) marked with <i>Curly</i> , non-balancer 2 <sup>nd</sup> chromosome marked with <i>Sternopleural</i> |                                                 |
| $yw nos.int; attP40$                                      | Expresses Phic31 integrase under <i>nanos</i> promoter; contains attP40 landing site in 2 <sup>nd</sup> chromosome, $yw$ genetic background                                                                 | [18]                                            |
| UAS-CYP9J28                                               | Bears a <i>Cyp9j28</i> transgene under UAS at random P-element insertion point at 2 <sup>nd</sup> chromosome, $yw$ genetic background.                                                                      | [17]                                            |
| HR-GAL4                                                   | Bears HR-GAL4 transgene (marked with miniwhite) at P-element insertion site in 2 <sup>nd</sup> chromosome                                                                                                   | [10]                                            |
| $para^{L1014F}$                                           | Bears a L1014F mutation in <i>para</i> ; X-chromosome derived from nos.Cas9, other chromosomes from $yw$ background.                                                                                        | This study                                      |
| $para^{V1016G}$                                           | Bears a V1016G mutation in <i>para</i> ; X-chromosome derived from nos.Cas9, other chromosomes from $yw$ background.                                                                                        |                                                 |
| $yw;HR-GAL4 > UAS-CYP9J28(2N)$                            | Bears both HR-GAL4 and UAS-CYP9J28 at the 2 <sup>nd</sup> chromosome, derived from genetic crossover, other chromosomes from $yw$ background.                                                               |                                                 |
| UAS-CYP6BQ23                                              | Bears a <i>Cyp6bq23</i> transgene under UAS at the attP40 insertion point at 2 <sup>nd</sup> chromosome, $yw$ genetic background.                                                                           |                                                 |
| $yw;attP40$                                               | Contains empty attP40 landing site in 2 <sup>nd</sup> chromosome, $yw$ genetic background (same as UAS-CYP6BQ23 but without the transgene)                                                                  |                                                 |
| $para^{L1014F};HR-GAL4$                                   | X-chromosome derived from $para^{L1014F}$ , 2 <sup>nd</sup> chromosome from HR-GAL4, other $yw$                                                                                                             |                                                 |
| $para^{L1014F};UAS-CYP6BQ23$                              | X-chromosome derived from $para^{L1014F}$ , 2 <sup>nd</sup> chromosome from UAS-CYP6BQ23, other $yw$                                                                                                        |                                                 |
| $para^{V1016G};HR-GAL4 > UAS-CYP9J28(2N)$                 | X-chromosome derived from $para^{V1016G}$ , 2 <sup>nd</sup> chromosome from $yw;HR-GAL4 > UAS-CYP9J28(2N)$ , other $yw$                                                                                     |                                                 |

**Table S2:** Primers used in this study

| Primer Name   | Sequence (5' – 3')        | Use                                         | Reference  |
|---------------|---------------------------|---------------------------------------------|------------|
| 935F          | CTTCGCAGGTCGCCATCCGGAAAG  | sgRNA935                                    | This study |
| 935R          | AAACCTTTCCGGATGGCGACCTGC  |                                             |            |
| 406F          | CTTCGACTTGTAACCGATGTTTAC  | sgRNA406                                    |            |
| 406R          | AAACGTAAACATCGTTTACAAGTC  |                                             |            |
| 205F          | CTTCGCCAATTCGATTGAAGGCCT  | sgRNA205                                    |            |
| 205R          | AAACAGGCCTTCAATCGAATTGGC  |                                             |            |
| kdrF          | TCGCTCCAAATCCAACCTGAT     | Sequencing,<br>allele screening             |            |
| kdrR          | ACCGACTTTATGCACAGCTT      |                                             |            |
| ParaInF       | GTTTGATTTGCTGTCAAGCC      | Sequencing<br><i>para</i> genomic<br>region |            |
| ParaInR       | CTGGCATTTTAACTTGTAACACAC  |                                             |            |
| exoF          | AATTTGCCATGTGGGAGTTGC     |                                             |            |
| exoR          | GATCGATCGCATCCTCAACT      |                                             |            |
| seq_F         | CGAAGGTGCGGCAAGTAAC       |                                             |            |
| seq_R         | GTGGCTTGAATGGCTGAGTC      |                                             |            |
| 1014UP        | ACCGCTTTCCCGACGGAGAT      | Allele screening                            |            |
| 1014DOWN      | GCATTATAGCCAGTAAGCATCGTA  |                                             |            |
| Cyp6bq23_RT_F | AAGTGGAAGAGCTTGAGGGC      | RT-PCR                                      |            |
| Cyp6bq23_RT_R | CTCGGGGTTCTTGATGCTGT      |                                             |            |
| Cyp6bq23_q_F  | TCTACGAGAACCCCGAGAAGTTC   | qPCR                                        |            |
| Cyp6bq23_q_R  | CTTGCTCAGGGTGATGTTGTAGTTC |                                             |            |
| Cyp9j28_RT_F  | CTCCACGTTTCATTCAGACGCT    | RT-PCR                                      | [17]       |
| Cyp9j28_RT_R  | CTCGAGTTCCCAAATACCTGC     |                                             |            |
| RPL11_Dm_F    | CGATCCCTCCATCGGTATCT      | RT-PCR<br>qPCR                              | [10]       |
| RPL11_Dm_R    | AACCACTTCATGGCATCCTC      |                                             |            |
| RPL32_Dm_F    | AGCATAACAGGCCCAAGATCG     | qPCR                                        | [38]       |
| RPL32_Dm_R    | GCACCAGGAACTTCTTGAATCC    |                                             |            |
| pPel_uas F    | GAAGAGAACTCTGAATAGGGAATTG | Sequencing                                  | [26]       |
| pPel_sv40 R   | CAAATGTGGTATGGCTGATTATG   |                                             |            |

**Table S3:** Contact bioassay deltamethrin responses of transgenic flies expressing pyrethroid metabolizing P450s alone or along engineered target site resistance mutations in their voltage gated sodium channel (*para*)

| Strain/Cross                                                         | LC <sub>50</sub><br>(µg/vial) | (95% FL)            | Slope (±SE)   | RR<br>(vs HR-GAL<br>x yw.attP40) | RR<br>(vs nos. Cas9) |
|----------------------------------------------------------------------|-------------------------------|---------------------|---------------|----------------------------------|----------------------|
| HR-GAL4 x yw; attP40                                                 | 1.689                         | (0.65-2.61)         | 1.406(±0.270) | 1                                |                      |
| HR-GAL4 x UAS-CYP6BQ23                                               | 16.35                         | (9.15 – 25.9)       | 2.455(±0.388) | 9.68                             |                      |
| <sup>1</sup> HR-GAL4>UAS-CYP9J28(2N)                                 | 4.249                         | (2.83- 6.814)       | 2.9(±0.33)    | 2.52                             |                      |
| nos.Cas9                                                             | 5.45                          | (2.4- 8.57)         | 2.748(±0.514) | 3.23                             | 1                    |
| <i>para</i> <sup>L1014F</sup>                                        | 866.02                        | (746.4 – 1,029.2)   | 6.895(±1.063) | 512.74                           | 158.9                |
| <i>para</i> <sup>V1016G</sup>                                        | 295.567                       | (222.252-440.5)     | 2.27(±0.42)   | 174.99                           | 54.23                |
| <sup>2</sup> <i>para</i> <sup>L1014F</sup> ; HR-GAL4> UAS-CYP6BQ23   | >5,000                        | n/a                 |               | <b>&gt;2960</b>                  | <b>&gt;917</b>       |
| <sup>3</sup> <i>para</i> <sup>V1016G</sup> ; HR-GAL4>UAS-CYP9J28(2N) | 2441.675                      | (1611.612-3816.105) | 2.67(±0.44)   | 1445.63                          | 448.13               |

<sup>1</sup>: homozygous recombinant yw; HR-GAL4>UAS-CYPJ28(2N) contains two copies of driver and responder

<sup>2</sup>: *para*<sup>L1014F</sup>; HR-GAL4 x *para*<sup>L1014F</sup>; UAS-CYP6BQ23

<sup>3</sup>: *para*<sup>V1016G</sup>; HR-GAL4>UAS-CYPJ28(2N) contains two copies of driver and responder in *para*<sup>V1016G</sup> X-chromosome background

**Table S4:** P-values of One-Way ANOVA test (Figure 3) for pupation time (Day 7 above diagonal, Day 8 below diagonal) among different genotypes of “Beetle” and “Mosquito” allelic combinations. Significant values are shown in bold.

| <b>Beetle</b>                                          | <i>para</i> <sup>L1014F</sup> | nos.Cas9      | <i>yw</i> ;HR-GAL4>UAS-CYP6BQ23    | <i>para</i> <sup>L1014F</sup> ;HR-GAL4>UAS-CYP6BQ23    | HR-GAL4> <i>yw</i> ;attP40 |
|--------------------------------------------------------|-------------------------------|---------------|------------------------------------|--------------------------------------------------------|----------------------------|
| <i>para</i> <sup>L1014F</sup>                          |                               | 0.9932        | 0.7676                             | <b>0.0044</b>                                          | 0.8876                     |
| nos.Cas9                                               | 0.9987                        |               | 0.9590                             | <b>0.0249</b>                                          | 0.9915                     |
| <i>yw</i> ;HR-GAL4>UAS-CYP6BQ23                        | 0.9148                        | 0.9845        |                                    | 0.0896                                                 | 0.9991                     |
| <i>para</i> <sup>L1014F</sup> ;HR-GAL4>UAS-CYP6BQ23    | <b>0.0274</b>                 | 0.0807        | 0.1829                             |                                                        | 0.0504                     |
| HR-GAL4> <i>yw</i> ;attP40                             | 0.9583                        | 0.9957        | 0.9999                             | 0.1338                                                 |                            |
| <b>Mosquito</b>                                        | <i>para</i> <sup>V1016G</sup> | nos.Cas9      | <i>yw</i> ;HR-GAL4>UAS-CYP9J28(2N) | <i>para</i> <sup>V1016G</sup> ;HR-GAL4>UAS-CYP9J28(2N) | HR-GAL4> <i>yw</i> ;attP40 |
| <i>para</i> <sup>V1016G</sup>                          |                               | 0.9802        | 0.8092                             | <b>0.0110</b>                                          | >0.9999                    |
| nos.Cas9                                               | 0.9993                        |               | 0.9896                             | <b>0.0039</b>                                          | 0.9869                     |
| <i>yw</i> ;HR-GAL4>UAS-CYP9J28(2N)                     | 0.4952                        | 0.6988        |                                    | <b>0.0004</b>                                          | 0.8399                     |
| <i>para</i> <sup>V1016G</sup> ;HR-GAL4>UAS-CYP9J28(2N) | <b>0.0048</b>                 | <b>0.0045</b> | <b>&lt;0.0001</b>                  |                                                        | <b>0.0093</b>              |
| HR-GAL4> <i>yw</i> ;attP40                             | 0.9995                        | 0.9920        | 0.3678                             | <b>0.0089</b>                                          |                            |

**Table S5:** P-values of One-Way ANOVA test (Figure 3) for total oviposition among different genotypes of “Beetle” and “Mosquito” allelic combinations. Significant values are shown in bold.

| <b>Beetle</b>                                          | <i>para</i> <sup>L1014F</sup> | nos.Cas9          | <i>yw</i> ;HR-GAL4>UAS-CYP6BQ23    | <i>para</i> <sup>L1014F</sup> ;HR-GAL4>UAS-CYP6BQ23    | HR-GAL4> <i>yw</i> ;attP40 |
|--------------------------------------------------------|-------------------------------|-------------------|------------------------------------|--------------------------------------------------------|----------------------------|
| <i>para</i> <sup>L1014F</sup>                          |                               |                   |                                    |                                                        |                            |
| nos.Cas9                                               | <b>0.0001</b>                 |                   |                                    |                                                        |                            |
| <i>yw</i> ;HR-GAL4>UAS-CYP6BQ23                        | <b>&lt;0.0001</b>             | 0.9482            |                                    |                                                        |                            |
| <i>para</i> <sup>L1014F</sup> ;HR-GAL4>UAS-CYP6BQ23    | <b>0.0008</b>                 | >0.9999           | 0.7084                             |                                                        |                            |
| HR-GAL4> <i>yw</i> ;attP40                             | <b>&lt;0.0001</b>             | 0.8735            | >0.9999                            | 0.5623                                                 |                            |
| <b>Mosquito</b>                                        | <i>para</i> <sup>V1016G</sup> | nos.Cas9          | <i>yw</i> ;HR-GAL4>UAS-CYP9J28(2N) | <i>para</i> <sup>V1016G</sup> ;HR-GAL4>UAS-CYP9J28(2N) | HR-GAL4> <i>yw</i> ;attP40 |
| <i>para</i> <sup>V1016G</sup>                          |                               |                   |                                    |                                                        |                            |
| nos.Cas9                                               | 0.4008                        |                   |                                    |                                                        |                            |
| <i>yw</i> ;HR-GAL4>UAS-CYP9J28(2N)                     | 0.6614                        | <b>0.0067</b>     |                                    |                                                        |                            |
| <i>para</i> <sup>V1016G</sup> ;HR-GAL4>UAS-CYP9J28(2N) | <b>0.0003</b>                 | <b>&lt;0.0001</b> | <b>0.0436</b>                      |                                                        |                            |
| HR-GAL4> <i>yw</i> ;attP40                             | <b>0.0087</b>                 | 0.8596            | <b>&lt;0.0001</b>                  | <b>&lt;0.0001</b>                                      |                            |



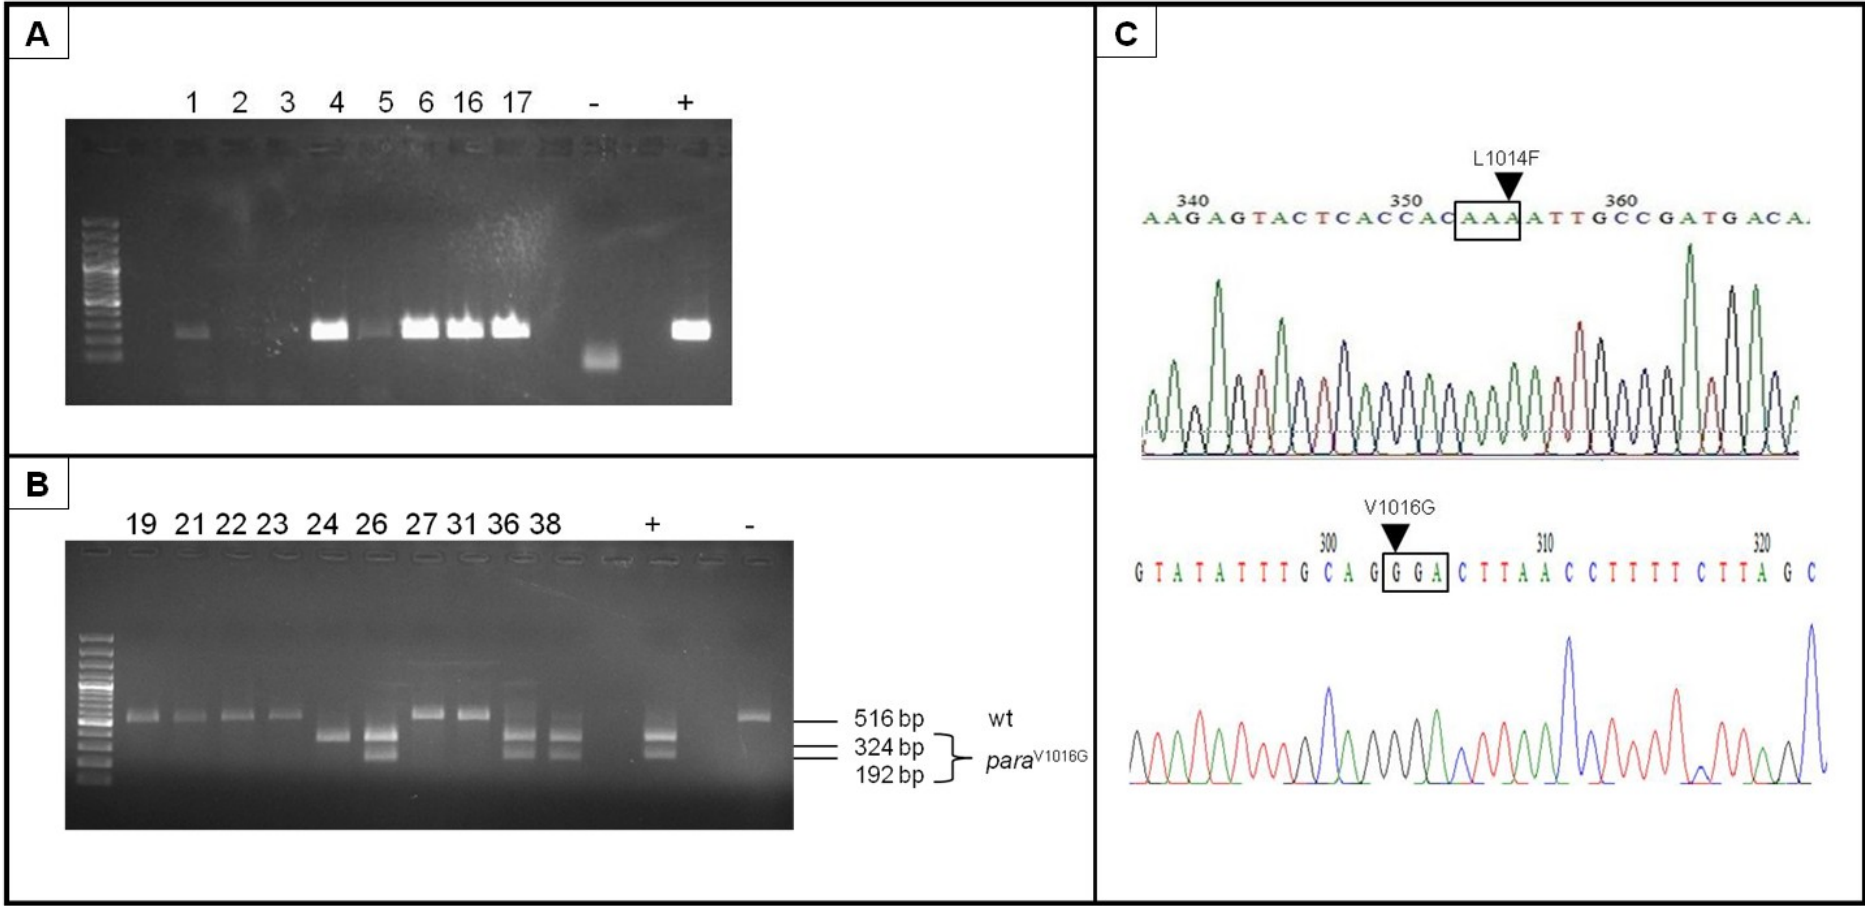

**Figure S2: Screening for genome-modified flies.** **A:** PCR screening following digestion with MscI of template DNA from pools of G<sub>1</sub> flies derived from different G<sub>0</sub> (injected) individuals using a specific primer pair (1014UP/1014DOWN) for L1014F mutation [-: nos.Cas9 DNA (negative control), +: donor plasmid template (positive control)]. **B:** Screening of G<sub>1</sub> flies for a *para*<sup>V1016G</sup> allele; following digestion with HaeII, PCR amplification with a “generic” primer pair (kdrF/kdrR), and digestion of 516 bp product with HindIII. The wild-type allele remains uncut, while the genome modified *para*<sup>V1016G</sup> allele is cut in two smaller bands; three positive crosses are visible [-: nos.Cas9 DNA (negative control), +: donor plasmid template (positive control)]. **C:** Sequencing of the relevant *para* region in homozygous genome modified flies. Top: L1014F (reverse complement), Bottom: V1016G.



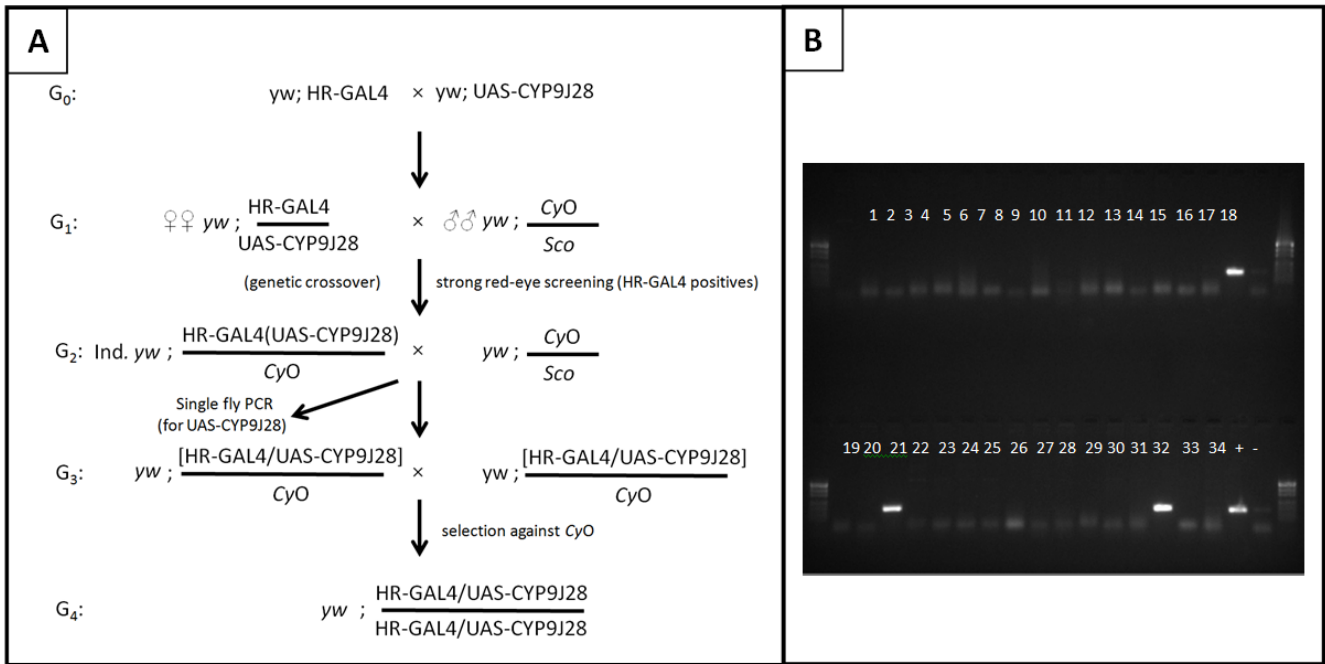

**Figure S3: Generation of homozygous recombinant strain  $yw;HR-GAL4>UAS-CYP9J28(2N)$ .** A: Crossing scheme for the generation of a strain bearing both HR-GAL4 and UAS-CYP9J28 in the 2<sup>nd</sup> chromosome, following a cross between lines HR-GAL4 [10] and UAS-CYP9J28 [17] that produces a heterozygous genotype ( $y$ ) $w;HR-GAL4>UAS-CYP9J28$ . Since both strains were originally generated by P-element mediated transgenesis at random (unknown) positions at the 2<sup>nd</sup> chromosome, the frequency of genetic crossover is proportional to the distance between the relevant insertion positions. Virgin ( $y$ ) $w;HR-GAL4/UAS-CYP9J28$  females were crossed with  $yw;CyO/Sco$  balancer males and the  $Cy$  progeny was monitored for the characteristic red-eye phenotype (derived from the  $w^+$  marker expression marking the HR-GAL4 transgene) in contrast to orange-eye phenotype (derived from the miniwhite marker expression marking the UAS-CYP9J28 transgene). Selected individuals, expected to have the HR-GAL4 transgene opposite to a  $CyO$  balancer, were crossed to  $yw;CyO/Sco$  balancer flies and after giving progeny they were individually screened for the presence of the UAS-CYP9J28 transgene by PCR amplification (B). Heterozygous  $yw; [HR-GAL4\_UAS-CYP9J28] / CyO$  flies

were then intercrossed to give the homozygous *yw*; HR-GAL4>UAS-CYP9J28(2N) strain following selection against *Cy* marker. **B**: Single fly PCR genotyping for the presence of the UAS-CYP9J28 transgene using primer pair Cyp9j28\_RT\_F/R. The presence of the diagnostic fragment indicates a genetic recombination event in three out of the 34 individuals examined.

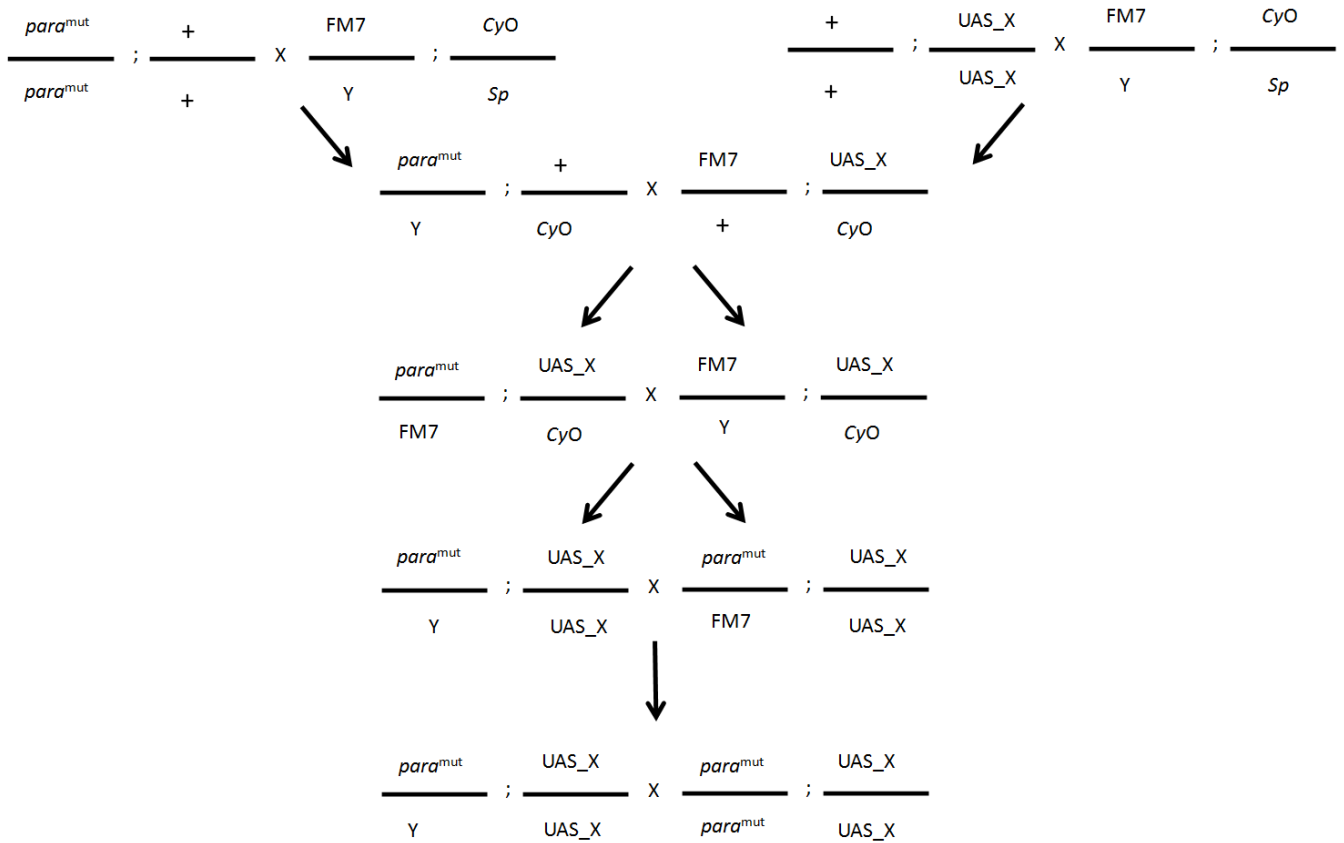

**Figure S4: Crossing scheme for generation of *Drosophila* lines expressing P450s in mutant *para* genetic background.** Genome engineered females bearing *para* mutations ( $para^{mut}$ ) are crossed to FM7;CyO/*Sp* males in order to generate  $para^{mut}$ ; CyO/+ males, while females from genetically transformed lines with a UAS insertion (UAS\_X) are also crossed to FM7;CyO/*Sp* males in order to generate FM7/+;UAS\_X/CyO females that are crossed to the  $para^{mut}$ ; CyO/+ males. Following the series of crosses depicted, we can generate strains bearing any transgene insertion located in chromosome 2 together with any X-linked *para* mutation of interest. In a similar fashion we have introduced both the HR-GAL4 driver and the UAS-CYP6BQ23 responder transgene in a  $para^{L1014F}$  genetic background, and the [HR-GAL4\_UAS-CYP9J28] linked alleles in a  $para^{V1016G}$  genetic background.

**Supplementary reference:**

38. Ponton F, Chapuis MP, Pernice M, Sword GA, Simpson SJ. 2011. Evaluation of potential reference genes for reverse transcription-qPCR studies of physiological responses in *Drosophila melanogaster*. *J. Insect Physiol.* **57**, 840–850. ([doi:10.1016/j.jinsphys.2011.03.014](https://doi.org/10.1016/j.jinsphys.2011.03.014))
